# Supplementary material
Source: PubMed Central journal article supplement (PMC4123638)
Supplement: NIHMS608080-supplement-SDC_2.pdf [file NIHMS608080-supplement-SDC_2.pdf]

## Supplemental Digital Content 2

### Topographic Distributions of Regional $^{18}\text{F}$ -FDG Kinetics Parameters

The regional  $^{18}\text{F}$ -FDG net uptake rate ( $K_i$ ), fractional volume of distribution ( $F_e$ ), and phosphorylation rate ( $k_3$ ) were dependent on gravitational position, with largest gradients observed in the High-Strain LPS group (Figure S6).

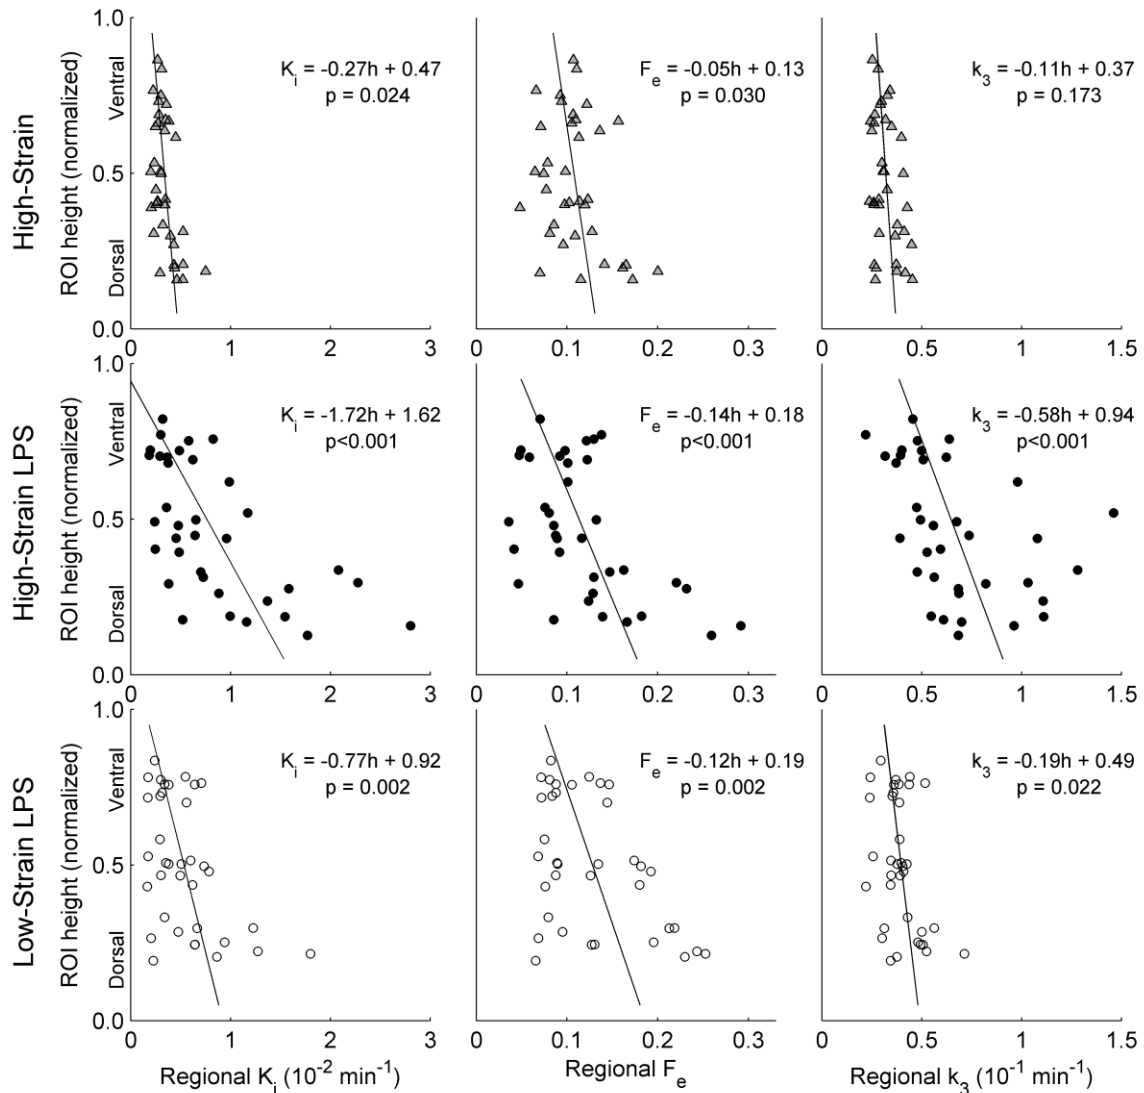

**Figure S6.** Distributions of  $^{18}\text{F}$ -FDG net uptake rate ( $K_i$ ), fractional volume of distribution ( $F_e$ ), and phosphorylation rate ( $k_3$ ) as a function of gravitational position. All parameters showed a dependence on gravitational position, with highest values in dorsal, dependent lung regions. Mixed-effects model fit and significance are shown.

### Dependence of Regional $^{18}\text{F}$ -FDG Kinetics Parameters on Tissue Density

In order to study the dependence of  $^{18}\text{F}$ -FDG kinetics parameters on tissue density, we analyzed the associations of  $K_i$ ,  $F_e$ , and  $k_3$  with fractional tissue density in the High-Strain group (Figure S7). We focused this analysis only on the High-Strain group because the lungs in this group were closest to “normal” lung conditions out of the three groups studied, and thus exhibited a higher degree of heterogeneity in tissue density than in metabolic activity. We found that both  $K_i$  and  $F_e$  showed strong linear associations with fractional tissue density ( $F_{\text{tissue}} = 1 - F_{\text{GAS}} - F_{\text{B}}$ ), supporting that these parameters are direct functions of tissue density. In contrast,  $k_3$  showed no dependence on  $F_{\text{tissue}}$  over a wide range of values of  $F_{\text{tissue}}$ , suggesting that  $k_3$  is not a direct function of tissue density.

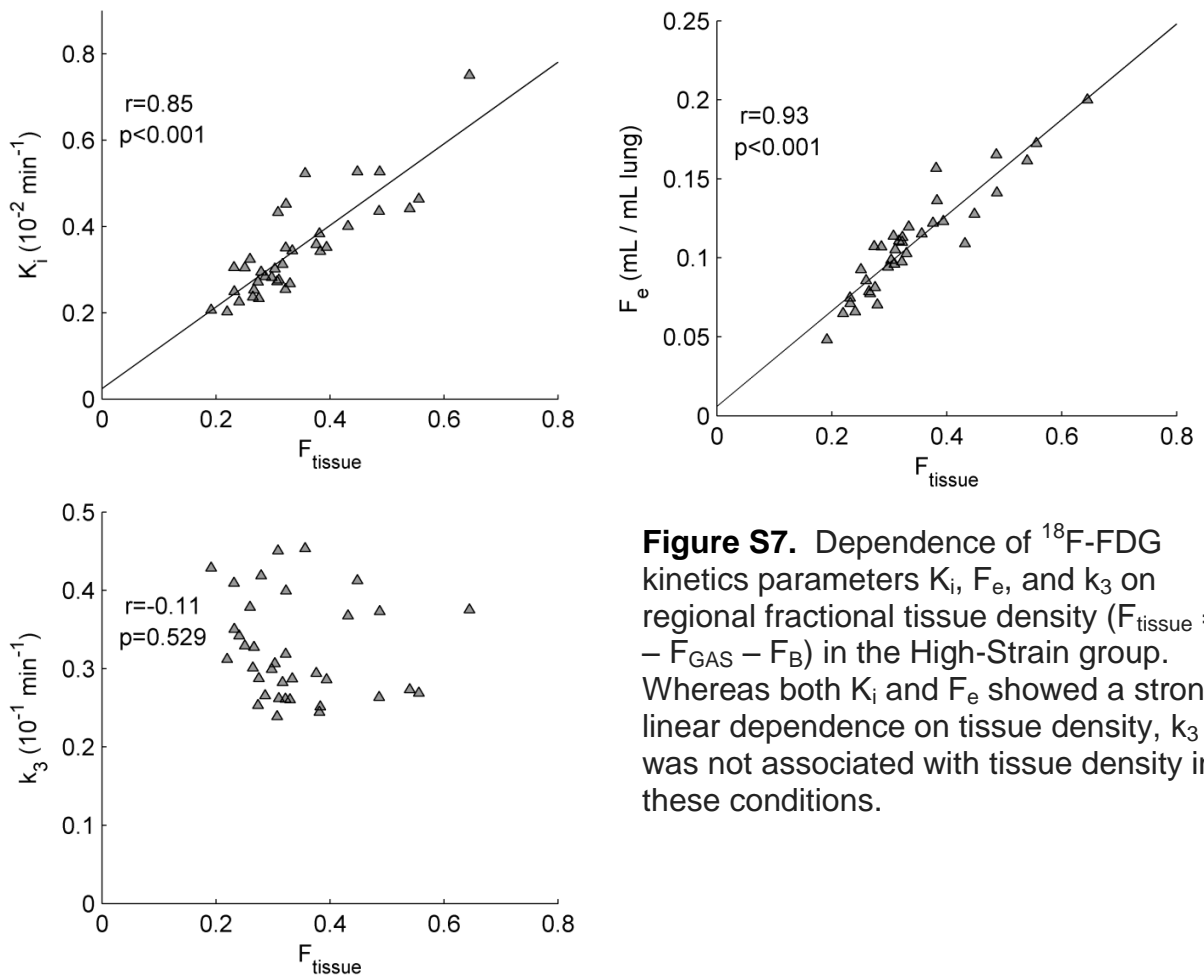

**Figure S7.** Dependence of  $^{18}\text{F}$ -FDG kinetics parameters  $K_i$ ,  $F_e$ , and  $k_3$  on regional fractional tissue density ( $F_{\text{tissue}} = 1 - F_{\text{GAS}} - F_{\text{B}}$ ) in the High-Strain group. Whereas both  $K_i$  and  $F_e$  showed a strong linear dependence on tissue density,  $k_3$  was not associated with tissue density in these conditions.
