# Supplementary material
Source: PubMed Central journal article supplement (PMC4123638)
Supplement: NIHMS608080-supplement-SDC_3.pdf [file NIHMS608080-supplement-SDC_3.pdf]

### Supplemental Digital Content 3

#### Within-animal Regressions of $k_3$ with sVol

The mixed-effects model regression of  $k_3$  onto sVol provided estimates of intercepts and slopes within each animal (i.e. the random effects within each study). These within-animal regressions are shown in Figure S8.

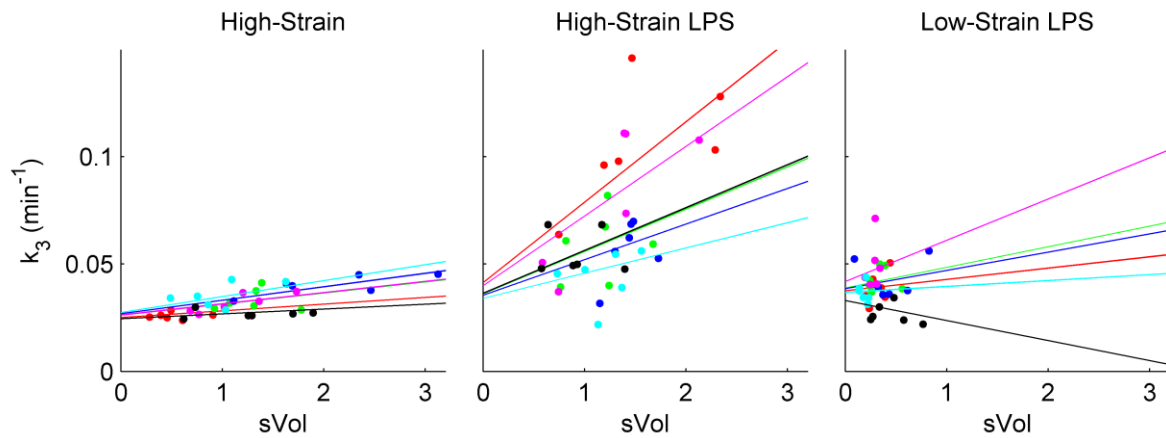

**Figure S8.** Within-animal regressions of  $k_3$  vs. sVol obtained with the mixed-effects model, with data from each animal and its regression line shown in the same color. Note the significantly smaller range of strain and  $k_3$  in the Low-Strain LPS group, resulting in a larger variability of estimated regression slopes. Effects of sVol on  $k_3$  were found in the High-Strain ( $p=0.027$ ) and High-Strain LPS ( $p=0.004$ ) groups, with significantly higher slopes in High-Strain LPS than in High-Strain ( $p=0.009$ ).
